# Supplementary material for: Use of 18F-NaF PET in the staging of skeletal metastases of newly diagnosed, high-risk prostate cancer patients: a nationwide cohort study
Source: PubMed Central journal article supplement — BMJ Open. 2022 Jun 15;12(6):e058898. doi: 10.1136/bmjopen-2021-058898 (PMC9204404; doi:10.1136/bmjopen-2021-058898), 2022-06-15
Supplement: bmjopen-2021-058898supp001.pdf [file bmjopen-2021-058898supp001.pdf]

## APPENDIX 1

**Table 1.** Registry data used in the analysis.

| Registry                                            | Code      |
|-----------------------------------------------------|-----------|
| The Danish Cancer Registry                          |           |
| ICD-10 diagnosis and morphologic codes              |           |
| Prostate cancer                                     | DC61.9    |
| Tumor stage                                         | TNM       |
| The Danish National Registry of Patients            |           |
| Imaging modality                                    |           |
| Danish Health Care Classification System, sks-codes |           |
| Bone scintigraphy                                   | WKBxx     |
| <sup>18</sup> F-NaF PET                             | WDTPSFCXX |
| The Danish National Registry of Patients            |           |
| Primary prostate cancer treatment                   |           |
| NCSP codes                                          |           |
| Radical prostatectomy                               | KKECxx    |
| The Danish National Registry of Patients            |           |
| Skeletal-related events                             |           |
| NCSP codes                                          |           |
| Radiation to bone                                   | BWGxx     |
| Surgery to bone                                     | KNAGxx    |
| ICD-10 codes                                        |           |
| Bone metastases                                     | DC79.5    |
| Spinal cord compression                             | DG952     |
| Pathological fractures                              |           |
| Osteoporotic fractures                              |           |
| The Danish Register of Laboratory Results           |           |
| NPU codes                                           |           |
| PSA                                                 | NPU0866   |
| The Danish National Pathology Registry              |           |
| SNOMED codes                                        |           |
| Gleason score                                       | ÆF0xx     |

NCSP: Nomesco Classification of Surgical Procedures; NPU: Nomenclature for Properties and Units; SNOMED: Systematized Nomenclature of Medicine

**Table 2.** Comorbidity codes from The Danish National Patient Registry used to calculate the Charlson Comorbidity Index. All codes are ICD-10 codes.

| Comorbidity                    | Code                                                                                                                                                                                                                                         |
|--------------------------------|----------------------------------------------------------------------------------------------------------------------------------------------------------------------------------------------------------------------------------------------|
| Myocardial infarction          | DI21, DI22                                                                                                                                                                                                                                   |
| Heart failure                  | DI099, DI110, DI130, DI132, DI255, DI425, DI426, DI427, DI429, DI428A, DP290, DI43, DI50, DE105, DE115, DE125, DE135, DE145                                                                                                                  |
| Peripheral vascular disease    | DI70, DI71, DI72, DI731, DI738, DI739, DI77, DI790, DI792, DK551, DK558, DK559, DZ958, DZ959                                                                                                                                                 |
| Cerebrovascular disease        | DI60, DI61, DI62, DI63, DI64, DI65, DI66, DI67, DI68, DI69, DG45, DG46, DH340                                                                                                                                                                |
| Dementia                       | DF00, DF01, DF02, DF03, DG30, DF051, DG311                                                                                                                                                                                                   |
| Chronic pulmonary disease      | DJ40, DJ41, DJ42, DJ43, DJ44, DJ45, DJ46, DJ47, DJ60, DJ61, DJ62, DJ63, DJ64, DJ65, DJ66, DJ67, DJ684, DI278, DI279, DJ84, DJ701, DJ703, DJ920, DJ953, DJ961, DJ982, DJ983                                                                   |
| Rheumatic disease              | DM05, DM06, DM08, DM09, DM30, DM31, DM32, DM33, DM34, DM35, DM35, DM36, D86                                                                                                                                                                  |
| Peptic ulcer disease           | DK25, DK26, DK27, DK28, DK221                                                                                                                                                                                                                |
| Mild liver disease             | DB18, DK700, DK701, DK702, DK709, DK703, DK713, DK714, DK715, DK717, DK73, DK74, DK760, DK762, DK763, DK764, DK769, DZ944                                                                                                                    |
| Severe liver disease           | DB150, DB160, DB162, DB190, DI850, DI859, DI864, DI982, DK704, DK711, DK721, DK729, DK765, DK766, DK767                                                                                                                                      |
| Diabetes without complications | DE100, DE101, DE108, DE109, DE110, DE111, DE119, DE120, DE121, DE129, DE130, DE131, DE139, DE140, DE141, DE149                                                                                                                               |
| Diabetes with complications    | DE102, DE103, DE104, DE105, DE106, DE107, DE112, DE113, DE114, DE115, DE116, DE117, DE118, DE122, DE123, DE124, DE125, DE126, DE127, DE128, DE132, DE133, DE134, DE135, DE136, DE137, DE138, DE142, DE143, DE144, DE145, DE146, DE147, DE148 |
| Hemiplegia paraplegia          | DG830, DG831, DG832, DG833, DG834, DG81, DG82, DG041, DG114, DG801, DG802, DG839                                                                                                                                                             |
| Renal disease                  | DN032, DN033, DN034, DN035, DN036, DN037, DN052, DN053, DN054, DN055, DN056, DN057, DZ490, DZ491, DZ492, DN18, DN19, DI120, DI131, DI132, DN250, DZ940, DZ992, DN26                                                                          |
| Any malignancy                 | DC0, DC1, DC2, DC3, DC40, DC41, DC42, DC43, DC44, DC45, DC46, DC47, DC48, DC49, DC5, DC6, DC70, DC71, DC72, DC73, DC74, DC75, DC76, DC86, DC97                                                                                               |
| Metastatic solidtumor          | DC77, DC78, DC79, DC80                                                                                                                                                                                                                       |
| AIDS/HIV                       | DB20, DB21, DB22, DB23, DB24                                                                                                                                                                                                                 |
| Leukemia                       | DC91, DC92, DC93, DC94, DC95                                                                                                                                                                                                                 |
| Lymphoma                       | DC81, DC82, DC83, DC84, DC85, DC88, DC90, DC96                                                                                                                                                                                               |

**Figure 1.** Unadjusted cumulative incidence with 95% confidence interval of skeletal-related events (SRE) in men after undergoing radical prostatectomy, restricted to men from the Capitol region of Denmark. Death was treated as a competing event. Red curve represents  $^{18}\text{F}$ -NaF PET, black curve bone scintigraphy.

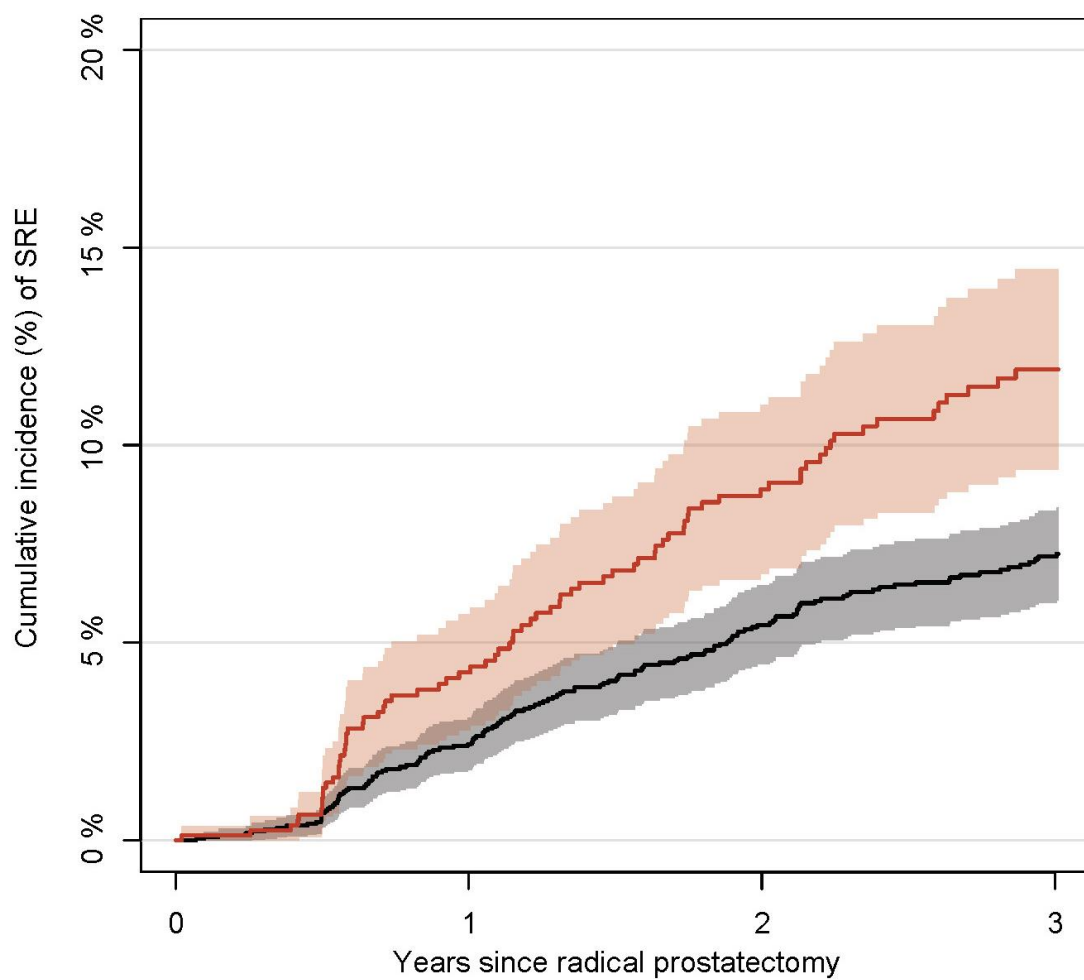

**Figure 2.** Hazard ratios for skeletal-related events following radical prostatectomy among patients receiving a  $^{18}\text{F}$ -NaF PET before surgery compared with patients receiving a bone scintigraphy. Restricted to the Capitol region of Denmark.

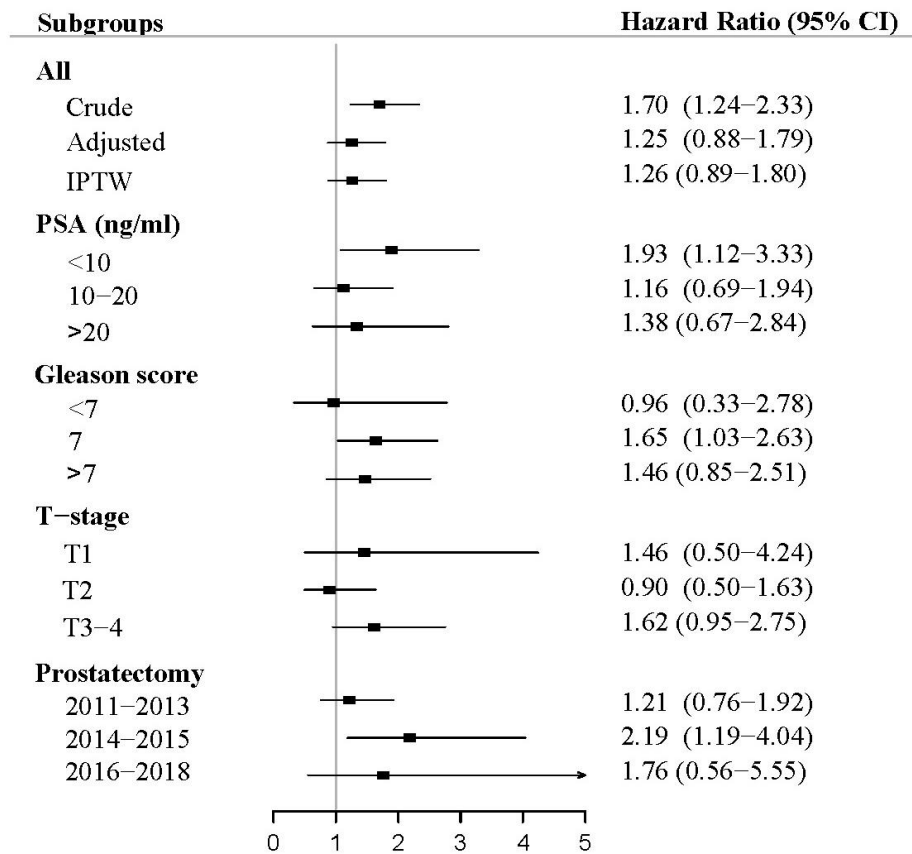

**Table 3.** Demographics for the Capitol region of Denmark. Baseline characteristics on the day of surgery for men with high-risk prostate cancer from 2011-2018\* Stratified by pre-surgery imaging.

|                            | <b>Bone scintigraphy (n=690)</b> | <b><sup>18</sup>F-NaF PET (n=740)</b> | <b>All (n=1,430)</b> |
|----------------------------|----------------------------------|---------------------------------------|----------------------|
| Age (year, median (IQR))   | 66.2 (60.8, 69.3)                | 67.9 (62.9, 71.1)                     | 66.9 (61.9, 70.1)    |
| Year of surgery            |                                  |                                       |                      |
| 2011-2013                  | 331 (48.0)                       | 212 (28.6)                            | 543 (38.0)           |
| 2014-2015                  | 185 (26.8)                       | 231 (31.2)                            | 416 (29.1)           |
| 2016-2018                  | 174 (25.2)                       | 297 (40.1)                            | 471 (32.9)           |
| PSA (ng/mL)                |                                  |                                       |                      |
| <10                        | 300 (44.1)                       | 250 (34.4)                            | 550 (39.1)           |
| 10-20                      | 229 (33.6)                       | 271 (37.3)                            | 500 (35.5)           |
| >20                        | 152 (22.3)                       | 206 (28.3)                            | 358 (25.4)           |
| Gleason score              |                                  |                                       |                      |
| <7                         | 81 (12.0)                        | 61 (8.3)                              | 142 (10.1)           |
| 7                          | 401 (59.6)                       | 432 (58.9)                            | 833 (59.2)           |
| >7                         | 191 (28.4)                       | 240 (32.7)                            | 431 (30.7)           |
| Clinical T-stage           |                                  |                                       |                      |
| T1                         | 58 (9.0)                         | 39 (6.3)                              | 97 (7.7)             |
| T2                         | 435 (67.3)                       | 220 (35.8)                            | 655 (51.9)           |
| T3-T4                      | 153 (23.7)                       | 356 (57.9)                            | 509 (40.4)           |
| Comorbidity                |                                  |                                       |                      |
| Cardiovascular diseases    | 35 (5.1)                         | 46 (6.2)                              | 81 (5.7)             |
| Other malignancies         | 29 (4.2)                         | 59 (8.0)                              | 88 (6.2)             |
| Diabetes                   | 21 (3.0)                         | 44 (6.0)                              | 65 (4.6)             |
| Charlson comorbidity index |                                  |                                       |                      |
| 1                          | 84 (12.2)                        | 103 (13.9)                            | 187 (13.1)           |
| >1                         | 59 (8.6)                         | 97 (13.1)                             | 156 (10.9)           |

\*Percentages may not sum to 100 due to rounding or missing data

IQR: Interquartile range; PSA: Prostate specific antigen; T-stage: Tumor stage.
